# Supplementary material for: Impact of virtual reality anatomy training on ultrasound competency development: A randomized controlled trial
Source: PLOS journal article supplement (doi:10.1371/journal.pone.0242731), 2020-11-23
Supplement: S3 (10.1371/journal.pone.0242731.s003) [file journal.pone.0242731.s003]

**S3 Table.** Performance assessment checklist

| Ultrasound competency evaluation form         |                                               |                                    |                                        |                                           |
|-----------------------------------------------|-----------------------------------------------|------------------------------------|----------------------------------------|-------------------------------------------|
| Organ/Landmark                                | View                                          | Not done <sup>a</sup><br>(0 point) | Partial done <sup>b</sup><br>(1 point) | Completely done <sup>c</sup><br>(2 point) |
| 1.Inferior Vena Cava                          | Sagittal view                                 |                                    |                                        |                                           |
| 2.Abdominal Aorta                             | Trace Aorta from upper Abdomen to bifurcation |                                    |                                        |                                           |
| 3.Morrison pouch                              | Coronal view                                  |                                    |                                        |                                           |
| 4.Douglas Pouch                               | Transverse View                               |                                    |                                        |                                           |
| 5.Pericardial Space                           | Subxiphoid view                               |                                    |                                        |                                           |
| 6.Spleen (with hilum)                         | Coronal view                                  |                                    |                                        |                                           |
| 7.Kidney (with cortex, medulla, renal pelvis) | Left side, coronal view                       |                                    |                                        |                                           |
| 8.Gall bladder                                | Subcostal View                                |                                    |                                        |                                           |
| 9.Main portal vein                            | Subcostal View                                |                                    |                                        |                                           |
| 10. Heart (LA, RV, LV, aortic root)           | Parasternal long axis View                    |                                    |                                        |                                           |

<sup>a</sup> Not done coded as scanning the wrong structure.

<sup>b</sup> Partial done coded as one of the following:

- 1) Scan the correct anatomical structure with poor quality of image or incomplete anatomical structure.
- 2) Wrong orientation of probe

<sup>c</sup> Complete done coded as scanning the correct as well as fully anatomical structure with correct orientation of probe. Also, image quality is good without shadow.
